# Supplementary material
Source: ML conference proceedings conference paper supplement (https://aclanthology.org/D14-1109)
Supplement: Attachment [file details.pdf › supplementary_material 2/details.pdf]

We briefly describe the modified scoring function combined with a tensor component and the corresponding online learning update. For more details, see the code and Lei et al. [2014].

**Scoring Function** For a given sentence  $x$ , let  $\phi(x, y)$  be the sparse vector representation of the 1st-, 3rd-order and global features (typically used by MST, Turbo, the sampling-based parsers, etc.). In addition, let  $\phi_m$  be a smaller feature vector defined on the word  $m$ , and  $\phi_{y(m),m}$  be a smaller feature vector defined on the arc  $y(m) \rightarrow m$  (we suppressed their dependence on  $x$ ). The combined scoring is defined as,

$$\begin{aligned} S(x, y) &= (1 - \gamma)S_{\text{tensor}}(x, y) + \gamma S_{\text{normal}}(x, y) \\ &= (1 - \gamma) \sum_m \sum_{i=r}^r [U\phi_{y(m)}]_i [V\phi_m]_i [W\phi_{y(m),m}]_i \\ &\quad + \gamma \theta^T \phi(x, y) \end{aligned}$$

where  $\gamma \in [0, 1]$  controls the weight of the two scoring components and  $\theta \in \mathbb{R}^L$  is the traditional parameter vector,  $U, V \in \mathbb{R}^{r \times k}$ ,  $W \in \mathbb{R}^{r \times d}$  are three rank- $r$  parameter matrices that factorize a 3-way low-rank tensor. The learning problem is to estimate parameter values for  $(\theta, U, V, W)$ .

**Online Update** The passive-aggressive online updates (tailored for the combined scoring) are carried in an alternative fashion, updating a pair of parameter sets  $(\theta, U)$ ,  $(\theta, V)$  and  $(\theta, W)$  at a time. The updates (say for  $\theta$  and  $U$ ) are in the following form,

$$\begin{aligned} \theta^{(t+1)} &= \theta(t) + \alpha^{(t)} \gamma d\theta \\ U^{(t+1)} &= U^{(t)} + \alpha^{(t)} (1 - \gamma) du \end{aligned}$$

Here  $\alpha^{(t)}$  is the step size,  $d\theta$  and  $du$  are the discrepancies between the gold tree  $\hat{y}$  and the violation tree  $\tilde{y}$ :

$$\begin{aligned} d\theta &= \phi(\hat{x}, \hat{y}) - \phi(\hat{x}, \tilde{y}) \\ du &= \sum_m [(V\phi_m) \odot (W\phi_{\hat{y}(m),m})] \otimes \phi_{\hat{y}(m)} \\ &\quad - \sum_m [(V\phi_m) \odot (W\phi_{\tilde{y}(m),m})] \otimes \phi_{\tilde{y}(m)} \end{aligned}$$

where  $\odot$  is the Hadamard (element-wise) product and  $\otimes$  is the tensor product.

## References

Tao Lei, Yu Xin, Yuan Zhang, Regina Barzilay, and Tommi Jaakkola. Low-rank tensors for scoring dependency structures. In *Proceedings of the 52th Annual Meeting of the Association for Computational Linguistics*. Association for Computational Linguistics, 2014.
