# Supplementary material
Source: ML conference proceedings conference paper supplement (https://aclanthology.org/D14-1109)
Supplement: Attachment [file proof.pdf › supplementary_material 2/proof.pdf]

Here we give the proofs of Theorem 1 and other necessary lemmas or corollaries.

**Lemma 1 (Reachability)** *Any two trees  $y, y'$  are reachable to each other. Specifically, let  $m_1, m_2, \dots, m_n$  be the bottom-up list of nodes in tree  $y$ , then there exists a path  $y = y^{(0)} \rightarrow y^{(1)} \rightarrow \dots \rightarrow y^{(n)} = y'$ , in which  $y^{(i)}$  is obtained by changing the head of  $m_i$ , i.e.  $y^{(i)}(m_i) = y'(m_i)$ , and this change **always** results in a valid tree (which has no circle).*

**Proof:** We show  $y^{(i)}$  is always a valid tree and therefore  $y^{(i)} \in \mathcal{T}(y^{(i-1)}, m_i)$ , because  $y^{(i)}$  and  $y^{(i-1)}$  differs at most at the head of  $m_i$  ( $y^{(i-1)}(m_i) = y(m_i)$  but  $y^{(i)}(m_i) = y'(m_i)$ ). Proof by induction on  $i = 1, \dots, n$ .

- **i=1:**  $m_1$  must be leaf node in  $y$  because  $m_1, \dots, m_n$  is a bottom-up (reverse DFS) order. Changing its head to any node cannot results in a circle. Therefore  $y^{(i)}$  is a tree when  $i = 1$ .
- **i>1:** Now let's change the head of  $m_i$  in tree  $y^{(i-1)}$ . Consider the subtree with root  $m_i$  in  $y^{(i-1)}$ . We now prove that any node  $x$  inside this subtree is already processed and its head is already changed, i.e.,  $x \in \{m_1, \dots, m_{i-1}\}$  and  $y^{(i-1)}(x) = y'(x)$ . This can be shown by contradiction. Assume a node  $x$  inside this subtree is not processed, and its head  $h$  has not been changed yet, i.e.,  $y(x) = y^{(i-1)}(x) = h$ . This implies the node  $h$  has not been processed neither, because all nodes are processed in bottom-up order. Repeat the same idea and we know that  $x, y(x), y(y(x)), \dots, y(y(\dots y(x) \dots)) = m_i$  are not processed. This contradicts to the fact that  $m_i$  is the next immediate unprocessed node in the bottom-up list, because its descendants are not processed. So all nodes in the subtree are processed and all arcs appear in the subtree are already arcs in  $y'$ . Changing the head of  $m_i$  cannot results in a circle (i.e., the new head of  $m_i$ ,  $y'(m_i)$  can not be a node inside this subtree, otherwise it implies there is a circle in tree  $y'$ , which is not possible). Thus  $y^{(i)}$  is a valid tree.

Finally  $y^{(n)} = y'$  because  $y^{(n)}(x) = y'(x)$  for all node  $x$ . In sum,  $y'$  is accessible via the path  $y = y^{(0)} \rightarrow \dots \rightarrow y^{(n)} = y'$ . ■

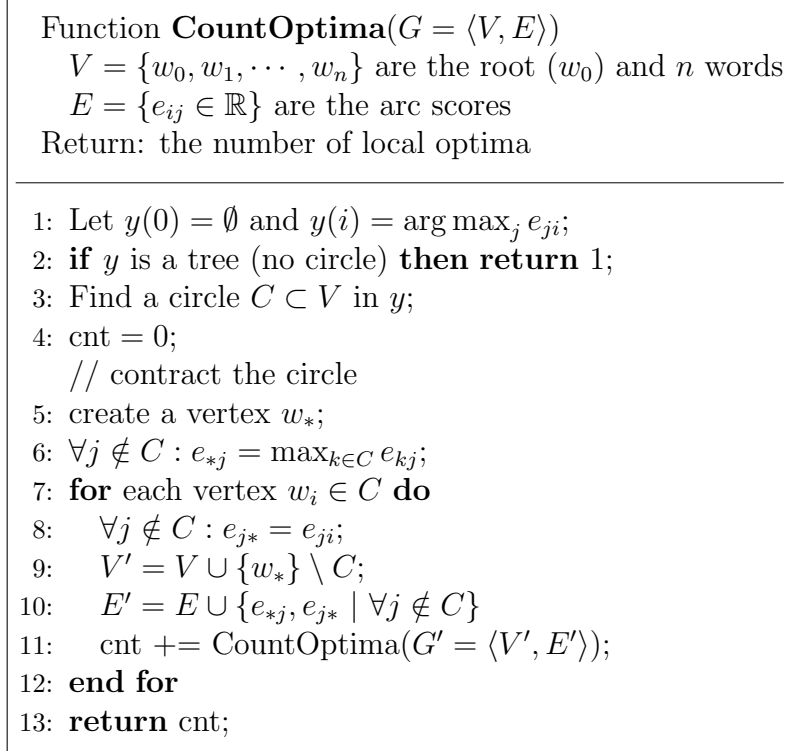

Figure 1: A recursive algorithm for counting local optima for a sentence with words  $w_1, \dots, w_n$  in first-order case. The idea is very similar to the Chu-Liu-Edmond algorithm for finding only the maximum directed spanning tree.

To prove Theorem 1, we start by proving the correctness of the recursive algorithm for counting local optima:

**Definitions** Let  $G = \langle V, E \rangle$  be a directed weighted graph of size  $n + 1$ , where vertices  $V = \{w_0, \dots, w_n\}$  represent a pseudo root node  $w_o$  and  $n$  words  $w_1, \dots, w_n$  in a sentence, and weights  $E = \{e_{ij} \in \mathbb{R}\}$  represent the first-order scores associated with individual arcs  $i \rightarrow j$ . A local optimum tree in  $G$  is a directed tree with root  $w_0$ , such that changing any **single** head cannot result in a better tree with higher score.<sup>1</sup>

**Lemma 2** *Let  $y(0) = \emptyset$  and  $y(i)$  be the index of the best possible head for*

<sup>1</sup>We assume there is no tie when comparing scores, trees or heads. If there is a tie, we can always break it by taking the tree (or head) that ranks higher in terms of alphabetic order.

word  $w_i$ , i.e.,  $y(i) = \arg \max_j e_{ji}$ . Then: **(a)**  $y$  is the unique local optimum in  $G$  if  $y$  is a tree; **(b)** otherwise let  $C$  be a circle in  $y$ , then any local optimum tree  $\tilde{y} \in G$  contains exactly  $|C| - 1$  arcs in the circle  $C$ .

**Proof:** **(a)** Simply by the definition of  $y$ .

**(b)** Proof by contradiction. Assume  $\tilde{y} \in G$  is a local optimum tree that contains less than  $|C| - 1$  arcs in the circle  $C$ . Consider a top-down order of nodes in  $\tilde{y}$ , and let  $u \in C$  be the **first** node (in the circle) in this top-down list. Now define  $\hat{y}$  as follows,

$$\hat{y}(x) = \begin{cases} \tilde{y}(x) & x \notin C \text{ or } x = u \\ y(x) & x \in C \text{ and } x \neq u \end{cases}$$

It's easy to verify that  $\hat{y}$  is a tree. Note that  $\hat{y}$  has exactly  $|C| - 1$  arcs of the circle  $C$ . By Lemma 1, there is a path from  $\tilde{y}$  to  $\hat{y}$  that never decreases the tree score, because the heads of  $\hat{y}$  is strictly better than those of  $\tilde{y}$ , i.e.,  $e_{\hat{y}(x)x} \geq e_{\tilde{y}(x)x}$ . This contradicts to the assumption that  $\tilde{y}$  is a local optimum tree.  $\blacksquare$

Now according to Lemma 2, one way to get the local optimum trees in  $G$  is as follows: (1) enumerate and pick a node  $u \in C$ ; (2) remove the arc  $y(u) \rightarrow u$  in the circle  $C$  and it becomes a chain; (3) fix these heads and arcs in the chain; (4) contract this chain and search for local optima in a smaller graph by applying Lemma 1 repeatedly:

**Definitions** Let  $G$ ,  $y$  and  $C$  be a graph, the set of best heads and the circle in  $y$  respectively. Without loss of generality, let  $w_1, \dots, w_c$  be the nodes in the circle  $C$ , where  $c = |C|$ . Define graph  $G^{(i)} = \langle V^{(i)}, E^{(i)} \rangle$  ( $i = 1, \dots, c$ ) as the **contraction** of graph  $G$  at  $w_i \in C$  as follows:

$$\begin{aligned} V^{(i)} &= V \cup \{w_*^{(i)}\} \setminus C \\ E^{(i)} &= \{e'_{jk}\} \end{aligned}$$

where

$$\begin{aligned} e'_{j*} &= e_{ji}, & \forall j \in V \setminus C \\ e'_{*j} &= \max_{k \in C} e_{kj} & \forall j \in V \setminus C \\ e'_{jk} &= e_{jk} & \forall j, k \in V \setminus C \end{aligned}$$

**Lemma 3** *Any local optimum tree  $\tilde{y} \in G^{(i)}$  is also a local optimum tree in  $G$  (by uncontracting the node  $w_*$  back to the chain); and vice versa, i.e., any local optimum tree  $\tilde{y} \in G$  is also a local optimum tree in one of  $G^{(i)}$  for  $i = 1, \dots, c$ .*

**Proof:** By Lemma 2 and the definitions of  $G^{(i)}$  and  $y$ . Details omitted here. ■

**Corollary 1** *Let  $F(G)$  be the number of local optimum tree in graph  $G$ : (a)  $F(G) = 1$  if  $y$  is a tree that has no circle; (b)  $F(G) = \sum_i F(G^{(i)})$  if  $y$  contains a circle  $C$ .*

**Proof:** By Lemma 2 and Lemma 3. ■

**Corollary 2** *The recursive algorithm in Figure 1 returns the number of local optima in graph  $G$ . Its complexity is linear to the number of local optima.*

**Proof:** By Lemma 2, Lemma 3 and Corollary 1. ■

**Theorem 1 (Local Optima Bound)** *For any first-order score function that factorizes into the sum of arc scores  $S(x, y) = \sum S_{arc}(y(m), m)$ : (a) the number of local optimum trees is at most  $2^{n-1}$  for  $n$  words; (b) this upper bound is tight.*

**Proof:** (a) Let  $\hat{F}(m)$  be the maximum number of local optimum trees in any graph of size  $m$ . By Corollary 1, we have:

$$\begin{aligned} \hat{F}(2) &= 1 \\ \hat{F}(m) &\leq \max_{2 \leq c \leq m-1} \hat{F}(m - c + 1) \times c \quad \forall m > 2 \end{aligned}$$

Solving this we get  $\hat{F}(m) \leq 2^{m-2}$ . For a sentence with  $n$  words, the corresponding graph has size  $m = n + 1$ , therefore the upper bound is  $2^{n-1}$ .

(b) For any  $n > 0$ , construct a graph  $G_n = \langle V, E \rangle$  as follows:

$$V = \{w_0, w_1, \dots, w_n\}$$

$$E = \{e_{ij}\}$$

where

$$e_{ij} = e_{ji} = i \quad \forall 0 \leq i < j \leq n$$

Note that  $w_{n-1} \rightarrow w_n \rightarrow w_{n-1}$  is a circle of length 2 in  $G_n$  and  $y$ . Then it can be shown by induction on  $n$  and Corollary 1 that  $F(G_n) = F(G_{n-1}) \times 2 = 2^{n-1}$ . ■
